# Supplementary figures and images for: Musik i palliativ vård : en intervjustudie med vårdpersonal
Source: eLife journal article supplement (doi:10.7554/elife.03563), 2013-01-01

**Figure 5 - supplement 1**

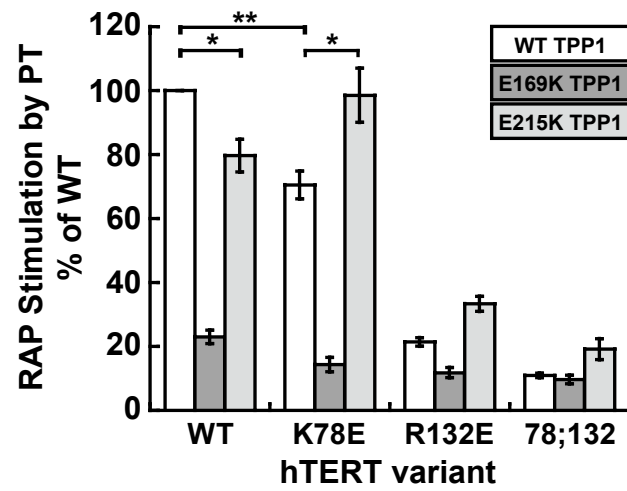

Supplement: supp [file elife_poa_e03563_Figure_5_Figure_Supplement_1.pdf › elife_poa_e03563_Figure_5_Figure_Supplement_1.pdf]

# Figure 5 - supplement 3

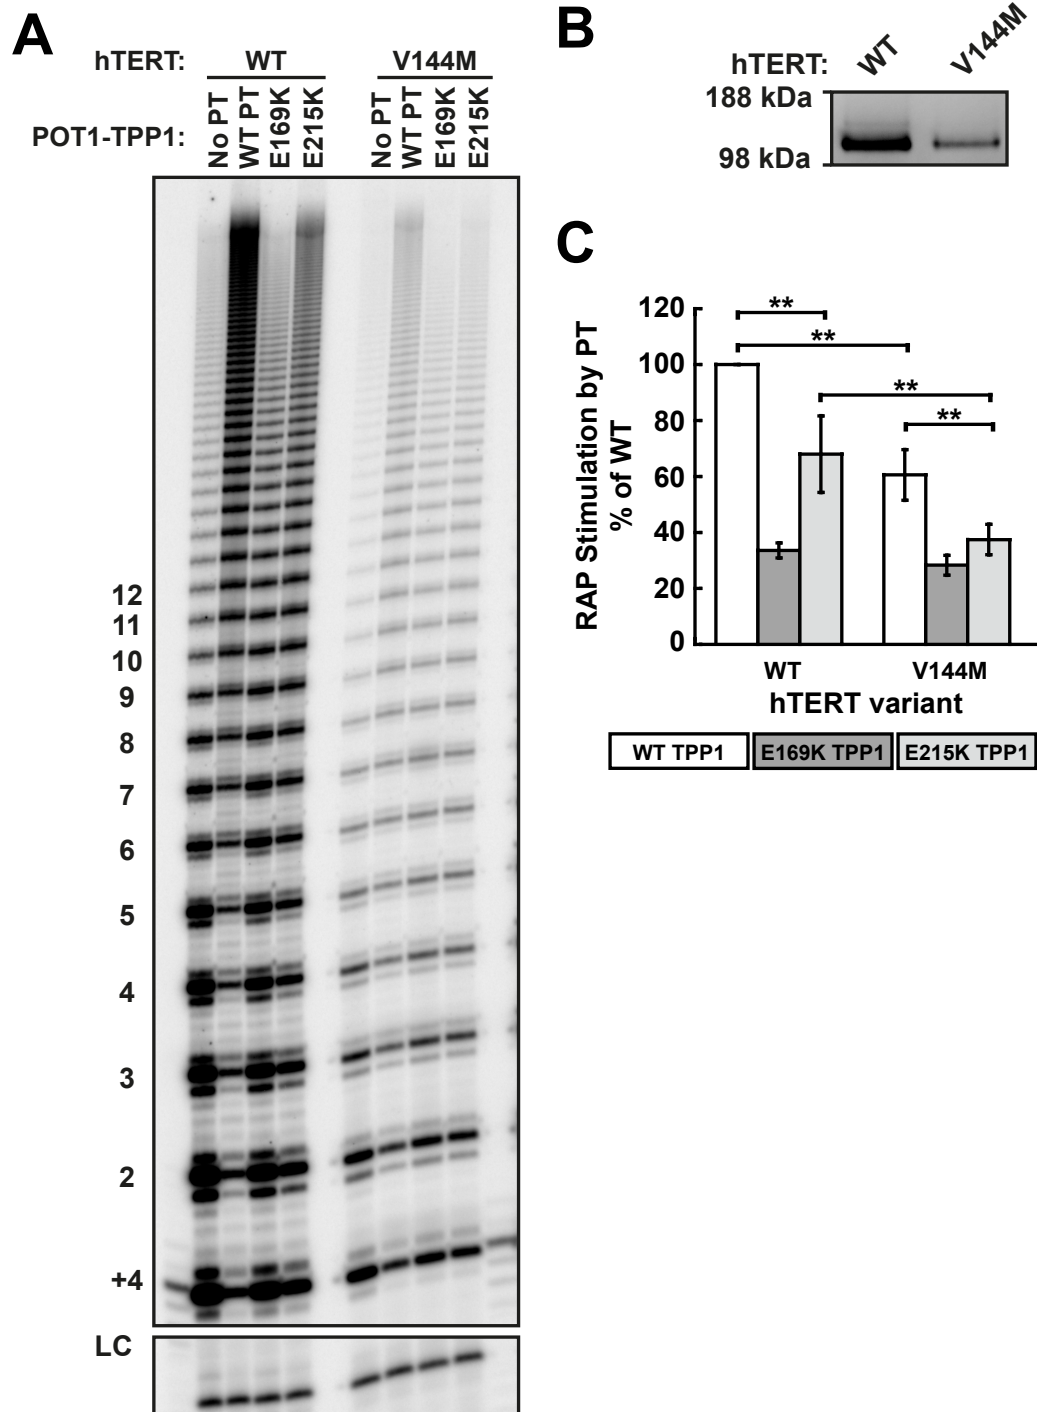

Supplement: supp [file elife_poa_e03563_Figure_5_Figure_Supplement_3.pdf › elife_poa_e03563_Figure_5_Figure_Supplement_3.pdf]
